# Supplementary material
Source: Springer Nature journal article supplement (https://www.springermedizin.de/resource/supplementary/12891_2013_2048_MOESM8_ESM.pdf/9509296)

**A**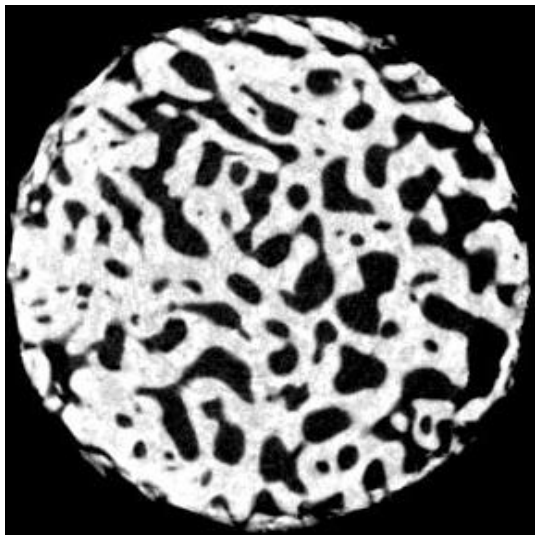**B**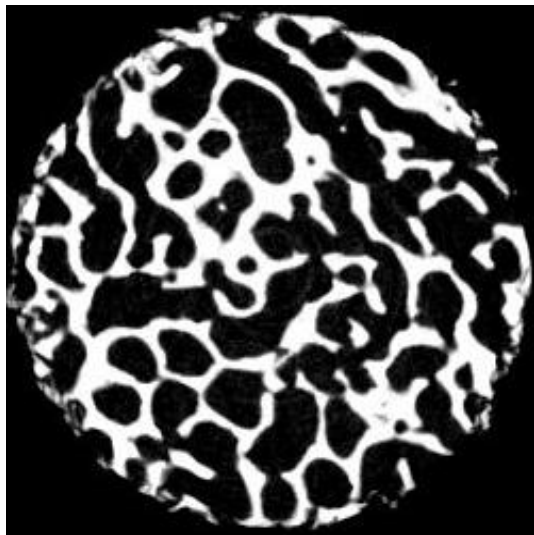**C**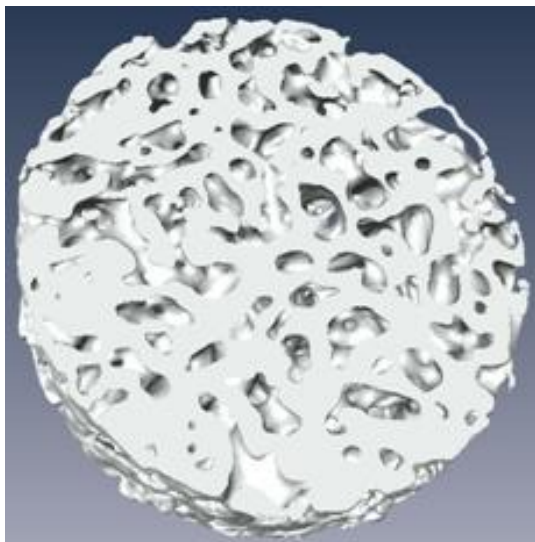**D**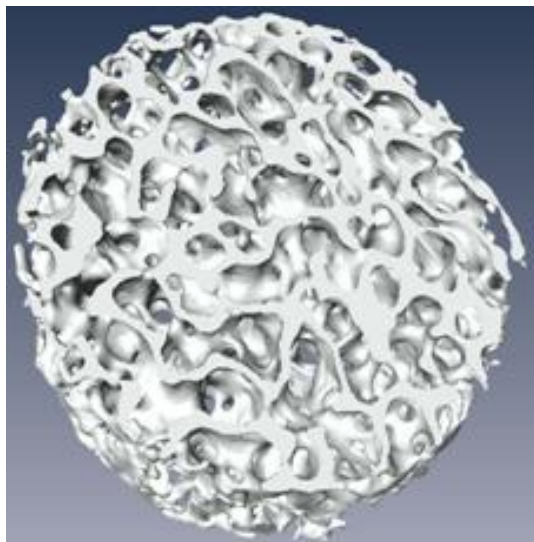

Supplement: MOESM8 [file 9509296]
